# Supplementary material
Source: PubMed Central journal article supplement (PMC4248689)
Supplement: EC.00199-14_zek999094369so1.pdf [file EC.00199-14_zek999094369so1.pdf]

Table S1

## Strains used in this study

| Strain                                                    | Genotype                                                                                                                                                                           | Source     |
|-----------------------------------------------------------|------------------------------------------------------------------------------------------------------------------------------------------------------------------------------------|------------|
| SN152                                                     | <i>arg4Δ/arg4Δ leu2Δ/leu2 Δ his1Δ/his1Δ<br/>ura3Δ::imm<sup>434</sup>/URA3 iro1Δ::imm<sup>434</sup>/IRO1</i>                                                                        | (1)        |
| DK318 (WT)                                                | <i>arg4Δ::ARG4 /arg4Δ his1Δ::HIS1/his1Δ<br/>ura3Δ::imm<sup>434</sup>/URA3 iro1Δ::imm<sup>434</sup>/IRO1</i>                                                                        | (2)        |
| MAY7 ( <i>ppg1Δ/+</i> )                                   | <i>ppg1Δ::C.m.HIS1/PPG1 arg4Δ::ARG4/arg4Δ<br/>leu2Δ::LEU2/leu2Δ his1Δ/his1Δ ura3Δ ::imm<sup>434</sup>/URA3<br/>iro1Δ ::imm<sup>434</sup>/IRO1</i>                                  | This study |
| MAY34 ( <i>ppg1Δ/Δ</i> )                                  | <i>ppg1Δ::C.d.HIS1/ppg1Δ::C.m.LEU2/<br/>arg4Δ::ARG4/arg4Δ leu2Δ/leu2Δ his1Δ/his1Δ<br/>ura3Δ::imm<sup>434</sup>/URA3 iro1Δ::imm<sup>434</sup>/IRO1</i>                              | This study |
| MAY50 ( <i>ppg1Δ/Δ::PPG1</i> )                            | <i>ppg1Δ::PPG1::SAT1/ppg1Δ::C.d.HIS1<br/>arg4Δ::ARG4/arg4Δ leu2Δ/leu2Δ his1Δ/his1Δ<br/>ura3Δ::imm<sup>434</sup>/URA3 iro1Δ::imm<sup>434</sup>/IRO1</i>                             | This study |
| MAY55 ( <i>ppg1Δ/Δ::ppg1<sub>H248A H173A D90L</sub></i> ) | <i>ppg1Δ::PPG1<sub>H248A H173A D90L</sub> ::SAT1/ppg1Δ::C.d.HIS1<br/>arg4Δ::ARG4/arg4Δ leu2Δ/leu2Δ his1Δ/his1Δ<br/>ura3Δ::imm<sup>434</sup>/URA3 iro1Δ::imm<sup>434</sup>/IRO1</i> | This study |
| MAY60 ( <i>tpk1Δ/Δ</i> )                                  | <i>tpk1Δ::frt/tpk1Δ::SAT1 arg4Δ::ARG4 /arg4Δ<br/>his1Δ::HIS1/his1Δ ura3Δ::imm<sup>434</sup>/URA3<br/>iro1Δ::imm<sup>434</sup>/IRO1</i>                                             | This study |
| HLC52 ( <i>efg1Δ/Δ</i> )                                  | <i>efg1Δ::hisG/efg1Δ::hisG-URA3-hisG<br/>ura3Δ::imm<sup>434</sup>/ura3Δ::imm<sup>434</sup></i>                                                                                     | (3)        |
| MAY65 ( <i>ppg1Δ/Δ tpk1Δ/Δ</i> )                          | <i>ppg1Δ::C.d.HIS1/ppg1Δ::C.m.LEU2<br/>tpk1Δ::frt/tpk1Δ::SAT1 arg4Δ::ARG4/arg4Δ leu2Δ/leu2Δ<br/>his1Δ/his1Δ ura3Δ::imm<sup>434</sup>/URA3 iro1Δ::imm<sup>434</sup>/IRO1</i>        | This study |
| MAY70 ( <i>ppg1Δ/Δ efg1Δ/Δ</i> )                          | <i>ppg1Δ::C.d.HIS1/ppg1Δ::C.m.LEU2<br/>efg1Δ::frt/efg1Δ::SAT1 arg4Δ::ARG4/arg4Δ leu2Δ/leu2Δ<br/>his1Δ/his1Δ ura3Δ::imm<sup>434</sup>/URA3 iro1Δ::imm<sup>434</sup>/IRO1</i>        | This study |
| MAY73 ( <i>tetO-PPG1</i> )                                | <i>tetR tetO-PPG1::FLP-SAT1/PPG1<br/>arg4Δ::ARG4 /arg4Δ his1Δ::HIS1/his1Δ<br/>ura3Δ::imm<sup>434</sup>/URA3 iro1Δ::imm<sup>434</sup>/IRO1</i>                                      | This study |

C.d. = *dublinsiensis*; C.m. = *C. maltosa*

## References

1. **Noble SM, Johnson AD.** 2005. Strains and strategies for large-scale gene deletion studies of the diploid human fungal pathogen *Candida albicans*. *Eukaryot Cell* **4**:298-309.
2. **Banerjee M, Thompson DS, Lazzell A, Carlisle PL, Pierce C, Monteagudo C, Lopez-Ribot JL, Kadosh D.** 2008. *UME6*, a novel filament-specific regulator of *Candida albicans* hyphal extension and virulence *Molecular biology of the cell* **19**:1354-1365.
3. **Lo HJ, Kohler JR, DiDomenico B, Loebenberg D, Cacciapuoti A, Fink GR.** 1997. Nonfilamentous *C. albicans* mutants are avirulent. *Cell* **90**:939-949.

**Table S2****Primers used in this study**

| #  | Primer Name | Sequence                                                                 | Description                                                                                                                                                             |
|----|-------------|--------------------------------------------------------------------------|-------------------------------------------------------------------------------------------------------------------------------------------------------------------------|
| 1  | MAO5        | GTATGCGCCCTAACTACCT                                                      | <i>PPG1</i> 5' flank upstream for fusion PCR                                                                                                                            |
| 2  | MAO6        | cacggcgcgctagcagcggCCCACATATAATGAACGA<br>CAGC                            | <i>PPG1</i> 5' flank downstream for fusion PCR                                                                                                                          |
| 3  | MAO7        | gtcagcggccgcatccctgcGAACCCATCATGTATTTC                                   | <i>PPG1</i> 3' flank upstream for fusion PCR                                                                                                                            |
| 4  | MAO8        | GAAGGGTTTTCAATTTGC                                                       | <i>PPG1</i> 3' flank downstream for fusion PCR                                                                                                                          |
| 5  | RZO37       | ccgetgctagcgcgcccgtgACCAGTGTGATGGAT<br>ATCTGC                            | 5' vector primer for <i>LEU2</i> , <i>ARG4</i> , <i>HIS1</i> markers (designed by R. Zordan)                                                                            |
| 6  | RZO38       | gcagggatcggcccgtgacAGCTCGGATCCACTA<br>GTAACG                             | 3' vector primer for <i>LEU2</i> , <i>ARG4</i> , <i>HIS1</i> markers (designed by R. Zordan)                                                                            |
| 7  | MAO155      | ATCACTAAAGCTCGACCAGTT                                                    | 5' <i>PPG1</i> flank upstream primer for split marker add-back of <i>PPG1</i>                                                                                           |
| 8  | MAO156      | ACTTCTTCTTTCTTCAGCTCTCTT                                                 | 5' <i>PPG1</i> flank upstream nested primer for split marker add-back of <i>PPG1</i>                                                                                    |
| 9  | MAO157      | ggtaccGTCTTGAAACTGATACAATTGGAGA                                          | 5' <i>PPG1</i> flank downstream primer for split marker add-back of <i>PPG1</i>                                                                                         |
| 10 | MAO158      | ccgcggCACACACGTACACACACATTC                                              | 3' <i>PPG1</i> flank upstream primer for split marker add-back of <i>PPG1</i>                                                                                           |
| 11 | MAO159      | GTAAAGCTAAGAGTAACTCGGT                                                   | 3' <i>PPG1</i> flank downstream primer for split marker add-back of <i>PPG1</i>                                                                                         |
| 12 | MAO160      | GGCGTATATGATGATTTAAGTTGGG                                                | 3' <i>PPG1</i> flank downstream nested primer for split marker add-back of <i>PPG1</i>                                                                                  |
| 13 | MAO77       | aggcgcgccatggccATGACGGTGCCGTTCAAATAC<br>C                                | Upstream non-mutagenic primer to clone <i>PPG1</i> into pAG10H vector using NcoI restriction enzyme. Also used as a non-mutagenic primer to generate D90L mutation.     |
| 14 | MAO78       | gcagccggatccTTACAAGAAATACTCAACTTGTT<br>GAC                               | Downstream non-mutagenic primer to clone <i>PPG1</i> into pAG10H vector using BamHI restriction enzyme. Also used as a non-mutagenic primer to generate H248A mutation. |
| 15 | MAO133      | CACTGAATAATAACCACGATCAACGTACA <u>AAA</u><br>CCCAAGAATAAATAATTAGTTTGAGGCG | <i>PPG1</i> downstream internal mutagenic primer to                                                                                                                     |

|    |        |                                                                         |                                                                                                         |
|----|--------|-------------------------------------------------------------------------|---------------------------------------------------------------------------------------------------------|
| 16 | MAO150 | CGTGGTTATTATTCAGTGGAACTATATC                                            | generate D90L mutation<br><i>PPG1</i> upstream internal non-mutagenic primer to generate H173A mutation |
| 17 | MAO151 | CCAATTGTTGACAACTGGGGGATAACCCACC<br><u>GGCACATGCAAATATCTTGCCATCTATAG</u> | <i>PPG1</i> downstream internal mutagenic primer to generate H173A mutation                             |
| 18 | MAO152 | CCAGTTGTCAACAATTGGATCAAATACGAGC<br>AGTCG                                | <i>PPG1</i> upstream internal non-mutagenic primer to generate H248A mutation                           |
| 19 | MAO153 | CTCGTATACCCTTCATTACACAATTGGGCAGC<br>TCTAATCATTTGCACC                    | <i>PPG1</i> downstream internal mutagenic primer to generate H248A mutation                             |
| 20 | MAO154 | GGTGCAAATGATTAGAGCTGCCCAATTGTGT<br>AATGAAGGGTATACGAG                    | <i>PPG1</i> upstream internal mutagenic primer to generate H248A mutation                               |
| 21 | MAO138 | GAGGTAGTTGGTGTGGAAAGA                                                   | 5' <i>TPK1</i> flank upstream primer for split marker deletion of <i>TPK1</i>                           |
| 22 | MAO148 | ACTGATGTCAATTTGTTGGCG                                                   | 5' <i>TPK1</i> flank upstream nested primer for split marker deletion of <i>TPK1</i>                    |
| 23 | MAO139 | ggtaccGAAAGGAGAAGGAGGAGGATAAC                                           | 5' <i>TPK1</i> flank downstream primer for split marker deletion of <i>TPK1</i>                         |
| 24 | MAO140 | ccgcggCACTATATGAATTGGCTTCCTTGTT                                         | 3' <i>TPK1</i> flank upstream primer for split marker deletion of <i>TPK1</i>                           |
| 25 | MAO141 | CTCAACTATTGTCTGAATGTGTGTATC                                             | 3' <i>TPK1</i> flank downstream primer for split marker deletion of <i>TPK1</i>                         |
| 26 | MAO149 | GGAAAGACCTCTAATTCGAT                                                    | 3' <i>TPK1</i> flank downstream nested primer for split marker deletion of <i>TPK1</i>                  |
| 27 | MAO126 | gatcataccgaacagaggtaccTACCTGGCCCTGGCAAA<br>C                            | 5' primer for -98 to -566 region of <i>PPG1</i> promoter used for cloning into pEL9                     |
| 28 | MAO128 | gatcataccgaacagaccgcggGTGGGTACACATTCAAC<br>AGA                          | 3' primer for -98 to -566 region of <i>PPG1</i> promoter used for cloning into pEL9                     |
| 29 | MAO127 | gatcataccgaacagaggtaccATGGATTGGGTAGTGGG<br>TGAT                         | 5' primer for -33 to +446 region of <i>PPG1</i> used for cloning into pEL9                              |
| 30 | MAO129 | gatcataccgaacagaccgcggGGCTGACCCTTGATATT<br>TGTTTAAG                     | 3' primer for -33 to +446 region of <i>PPG1</i> used for cloning into pEL9                              |
| 31 | DKO400 | GACATATTGACCGACATAAT                                                    | 5' WT <i>ARG4</i> add-back primer                                                                       |
| 32 | DKO401 | CTAATGACTGAATTTGATGTA                                                   | 3' WT <i>ARG4</i> add-back primer                                                                       |

|    |         |                                 |                                                     |
|----|---------|---------------------------------|-----------------------------------------------------|
| 33 | DKO404  | GTCGACTATGTCATTCAAGC            | 5' WT <i>LEU2</i> add-back primer                   |
| 34 | DKO405  | CAGTTGTGTGCATATTTAGA            | 3' WT <i>LEU2</i> add-back primer                   |
| 35 | GSO127  | ATGGACGGTGGTATGTTTTAG           | Split marker upstream primer for <i>SAT</i> flipper |
| 36 | GSO128  | TGTTGAATCAATTGCCTTGC            |                                                     |
| 37 | GSO129  | ATAGGATCCGAAGTTCCTATACTTTCTAGAG | Forward primer for full length <i>SAT</i> flipper   |
| 38 | GSO130  | GTCAGATCTGAAGTTCCTATTCTC        | Reverse primer for full length <i>SAT</i> flipper   |
| 39 | DKO523  | GTTGACCGAAGCTCCAATGAATCC        | 5' primer for <i>ACT1</i> probe                     |
| 40 | DKO526  | CAGCAATACCTGGGAACATGG           | 3' primer for <i>ACT1</i> probe                     |
| 41 | DTO15   | GACCAAGCACCTACTGTTCC            | 5' primer for <i>ECE1</i> probe                     |
| 42 | DTO16   | GATCTAGTAATGAGTTGTGG            | 3' primer for <i>ECE1</i> probe                     |
| 43 | DTO19   | CAGGAAGAACCTTGTGATTACC          | 5' primer for <i>HWPI</i> probe                     |
| 44 | DTO20   | GTTGGAACAGAAGTGTTTGG            | 3' primer for <i>HWPI</i> probe                     |
| 45 | DK258   | CAACAATCACCTCACTTGCAACCC        | 5' primer for <i>NRG1</i> probe                     |
| 46 | DK251   | GCTTCTAAAGTCCTGTGTTGTTGTC       | 3' primer for <i>NRG1</i> probe                     |
| 47 | *MBO84  | ATGACACCATGTCAAGTTCAGA          | 5' primer for <i>ALS3</i> probe                     |
| 48 | *MBO158 | CACACCAAATTGGAGGTGATT           | 3' primer for <i>ALS3</i> probe                     |

Note: Lowercase bases indicate flanking sequences which contain restriction sites for cloning.

\*In order to generate a *ALS3*-specific probe, a 1017 bp fragment was generated using these primers which was cleaved with *HincII* to yield a 758 bp product, as previously described<sup>1</sup>.

Note: Underlined bases were mutated.

## Reference

1. Hoyer, L.L., Payne, T.L., Bell, M., Myers, A.M. and S. Scherer. 1998. *Candida albicans ALS3* and insights into the nature of the *ALS* gene family. *Curr Genet* 33:451-459.

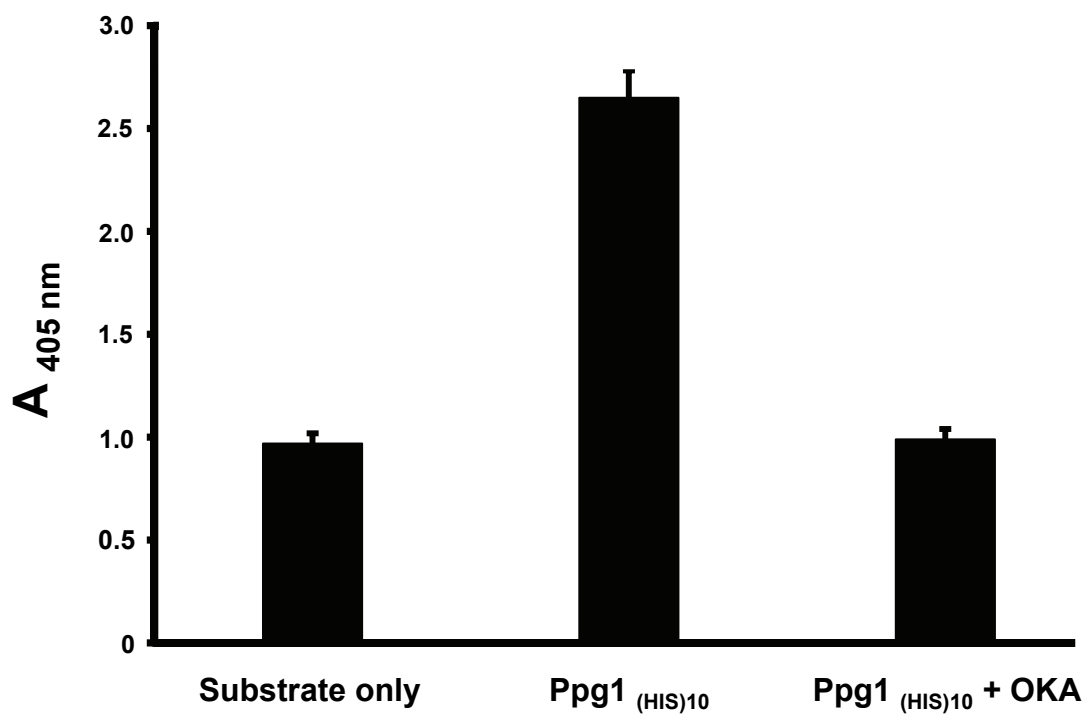

**FIG S1.** Ppg1 phosphatase activity is strongly inhibited by okadaic acid. Phosphatase assays were performed in the presence and absence of 1  $\mu$ M okadaic acid (OKA) using the Ppg1<sub>(HIS)10</sub> recombinant protein.

**A**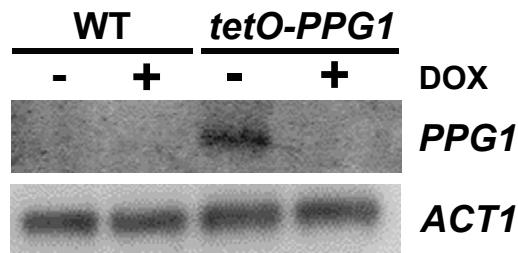**B**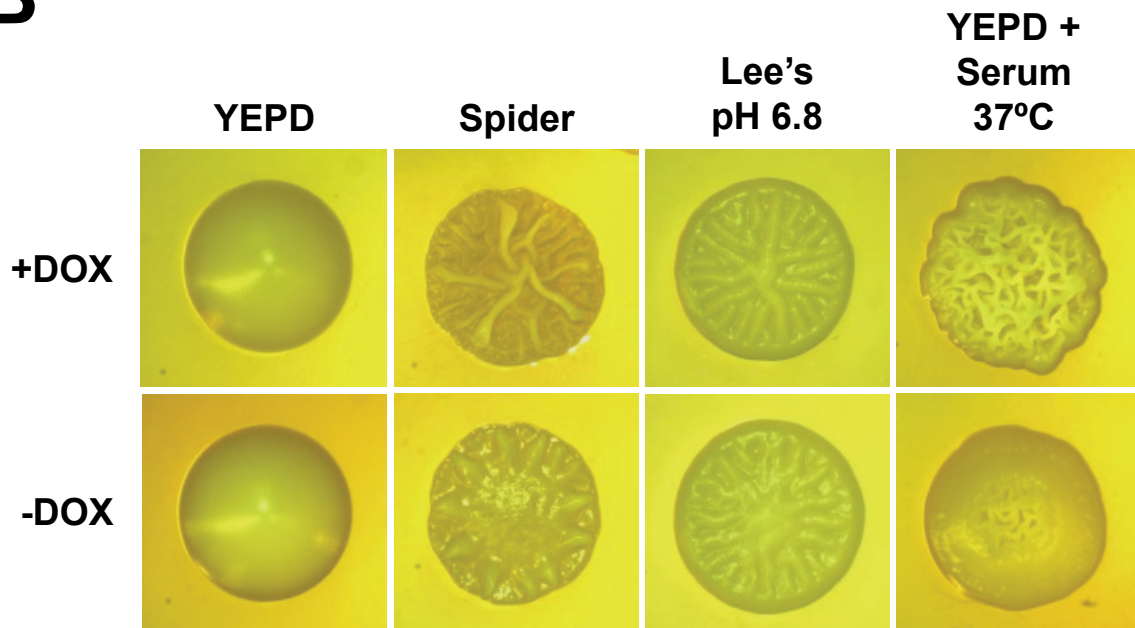

**FIG S2.** High-level constitutive *PPG1* expression affects colony morphology under solid filament-inducing conditions. (A) The indicated strains were grown in YEPD at 30°C overnight in the presence and absence of 20 µg/mL Dox. Cells were harvested for RNA preparation and Northern analysis. 3 µg of total RNA was loaded in each lane and the Northern blot was probed with *PPG1*. *ACT1* is shown as a loading control. (B) Colonies of the *tetO-PPG1* strain were grown on the indicated solid media at 30°C (or 37°C for YEPD + serum) for 2 days in the presence and absence of 20 µg/mL Dox and visualized using light microscopy.

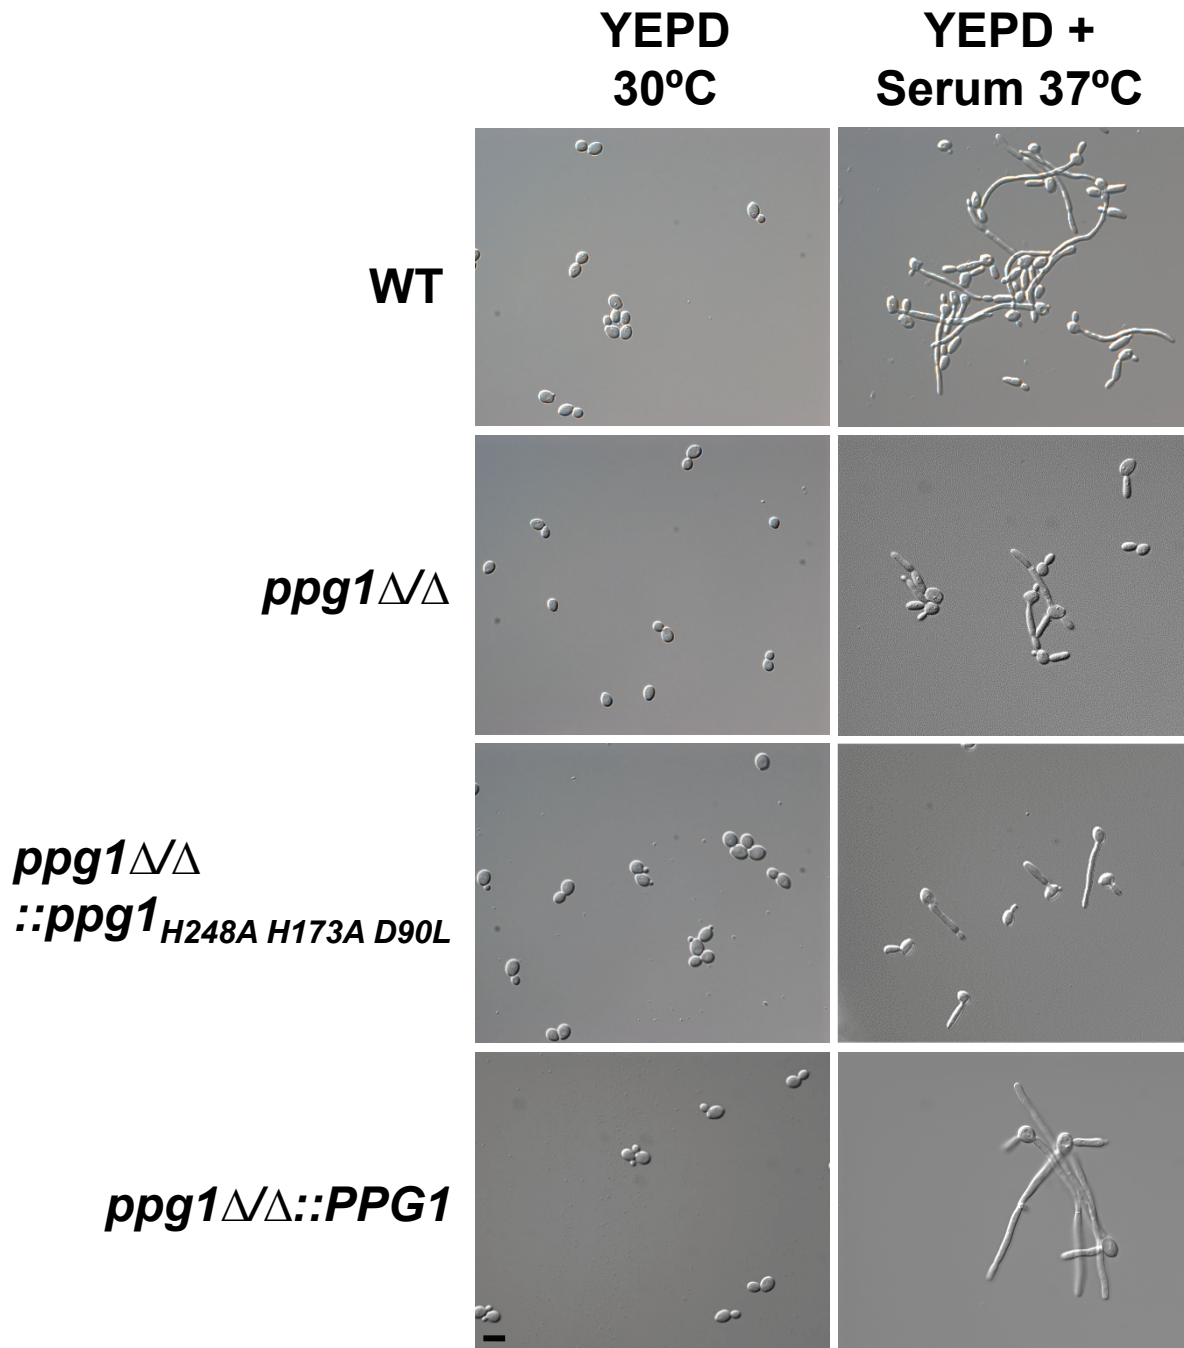

**FIG S3.** The *ppg1*<sub>H248A H173A D90L</sub> catalytic mutant shows an equivalent filament extension defect to that of the *ppg1*Δ/Δ strain. The indicated strains were grown in YEPD at 30°C overnight, diluted 1:10 into the indicated pre-warmed media and harvested at the 3 h. time point. Cells were fixed and prepared for DIC microscopy as described in Figure 3. Bar =10 μm.



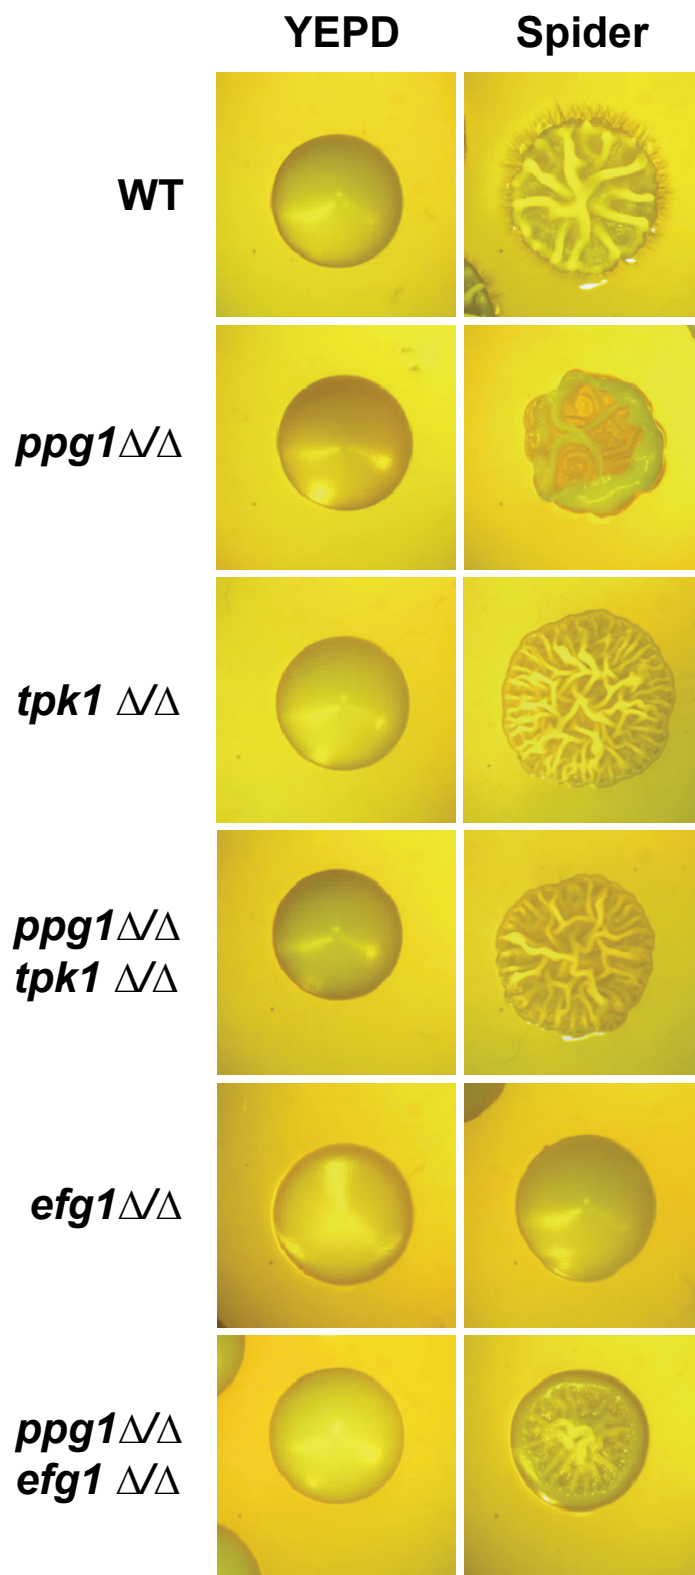

**FIG S4.** The *tpk1*Δ/Δ mutation is epistatic to the *ppg1*Δ/Δ mutation under solid filament-inducing conditions. The indicated strains were grown for three days on solid medium under non-filament-inducing (YEPD at 30°C) and filament-inducing (Spider at 30°C) conditions. Colonies were visualized by light microscopy.
